# Supplementary material for: Boron Enrichment in Martian Clay
Source: PubMed Central journal article supplement (PMC3675118; doi:10.1371/journal.pone.0064624), 2013-06-06
Supplement: pone.0064624.s002.pdf [file pone.0064624.s002.pdf]

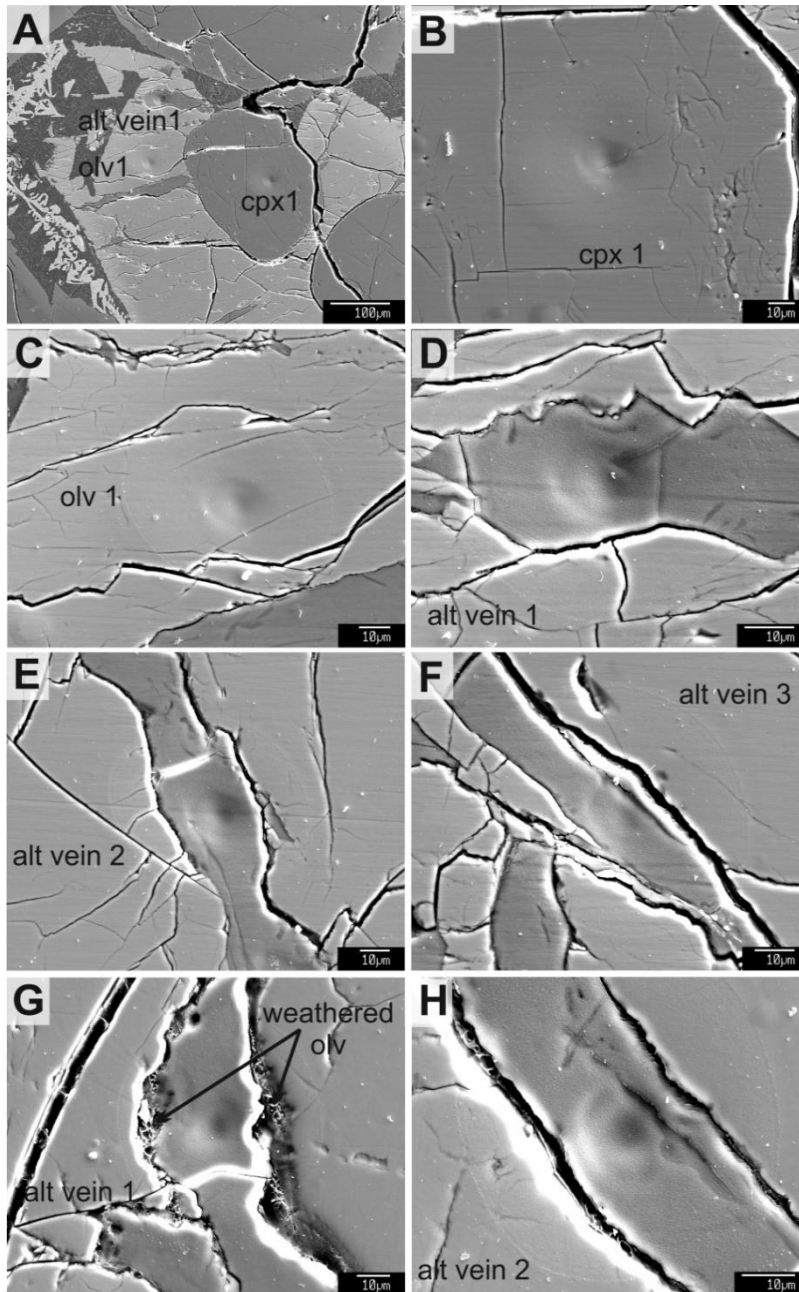

**Figure S2:** Secondary electron images of Cameca ims 1280 ion microprobe analysis pits in MIL 090030,23 (A-F) and MIL 090030,25 (G-H). As in Figure S1, the pre-sputtered 30 μm region in these images is visible as a slightly lighter grey area surrounding the central 10 μm analysis pit (labels mark the extent of this area). For alteration vein analyses the pre-sputtered area extends beyond the margins of the vein. However, all central analysis pits lie within these margins. MIL 090030,25 alteration vein 1 exhibits weathered olivine around its margins. All visible cracks are empty of epoxy resin (as evidenced by X-ray imaging). Olv = olivine, cpx = clinopyroxene.
