# Supplementary material for: Boron Enrichment in Martian Clay
Source: PubMed Central journal article supplement (PMC3675118; doi:10.1371/journal.pone.0064624), 2013-06-06
Supplement: pone.0064624.s005.pdf [file pone.0064624.s005.pdf]

**Table S3:** Glass standard measured boron abundances.

| <b>Standard</b> | <b>Boron (ppm)</b> | <b>2<math>\sigma</math> error</b> |
|-----------------|--------------------|-----------------------------------|
| BCR glass 1     | 5.1                | 2.3                               |
| BCR glass 2     | 4.7                | 2.2                               |
| BCR glass 3     | 5.0                | 2.3                               |
| BCR glass 4     | 4.9                | 2.2                               |
| BCR glass 5     | 5.4                | 2.5                               |
| BCR glass 6     | 4.9                | 2.2                               |
| BCR glass 7     | 5.3                | 2.4                               |
| GSA glass 1     | 27                 | 12                                |
| GSA glass 2     | 28                 | 13                                |
| GSA glass 3     | 32                 | 15                                |
| GSA glass 4     | 31                 | 14                                |
