# Supplementary material for: Boron Enrichment in Martian Clay
Source: PLoS One. 2013 Jun 6;8(6):e64624. doi: 10.1371/journal.pone.0064624 (PMC3675118; doi:10.1371/journal.pone.0064624)
Supplement: Table S2 — Representative major and minor element abundances. (PDF) [file pone.0064624.s004.pdf]

**Table S2:** Representative major and minor element abundances.

|                                | SM olivine | SM calcite | SM dolomite | SM matrix 1 | SM matrix 2 | SM matrix 3 | MIL cpx 1 | MIL olv 1 | MIL alt 1 | MIL alt 2 | MIL alt 3 |
|--------------------------------|------------|------------|-------------|-------------|-------------|-------------|-----------|-----------|-----------|-----------|-----------|
| SiO <sub>2</sub>               | 42.48      | 0.03       | 0.26        | 26.95       | 24.16       | 25.57       | 51.22     | 33.03     | 43.18     | 41.92     | 39.35     |
| TiO <sub>2</sub>               | 0.08       | bd         | 0.05        | 0.04        | 0.10        | 0.02        | 0.37      | 0.01      | 0.08      | 0.08      | bd        |
| Al <sub>2</sub> O <sub>3</sub> | 0.28       | 0.03       | 0.01        | 2.29        | 2.46        | 2.31        | 0.88      | bd        | 0.15      | 0.10      | 0.13      |
| Cr <sub>2</sub> O <sub>3</sub> | 0.06       | 0.03       | 0.04        | 1.13        | 0.73        | 0.26        | 0.33      | bd        | bd        | bd        | 0.03      |
| FeO                            | 0.49       | 1.63       | 3.47        | 22.65       | 30.18       | 31.08       | 13.74     | 46.74     | 32.64     | 33.77     | 32.17     |
| MnO                            | bd         | 0.19       | 1.81        | 0.19        | 0.07        | 0.23        | 0.40      | 0.98      | 0.62      | 0.60      | 0.56      |
| MgO                            | 56.60      | 1.26       | 17.19       | 18.89       | 15.25       | 13.37       | 12.71     | 17.69     | 5.88      | 5.92      | 5.47      |
| CaO                            | 0.69       | 53.25      | 30.50       | 0.20        | 0.12        | 0.98        | 19.33     | 0.45      | 0.13      | 0.18      | 0.14      |
| Na <sub>2</sub> O              | 0.01       | 0.01       | 0.04        | 0.60        | 0.61        | 0.58        | 0.22      | bd        | 0.01      | 0.03      | 0.04      |
| K <sub>2</sub> O               | bd         | bd         | bd          | 0.08        | 0.06        | 0.04        | bd        | bd        | 0.04      | 0.04      | 0.05      |
| CO <sub>2</sub>                | n/a        | 43.86      | 46.50       | n/a         | n/a         | n/a         | n/a       | n/a       | n/a       | n/a       | n/a       |
| <b>Total</b>                   | 100.70     | 100.28     | 99.86       | 73.01       | 73.72       | 74.44       | 99.20     | 98.90     | 82.74     | 82.62     | 77.96     |

cpx = clinopyroxene. olv = olivine. alt = alteration vein. bd = below detection. n/a = CO<sub>2</sub> was stoichiometrically calculated for calcite and dolomite, but is not present in the other phases. Low totals for matrix and alteration veins reflect the presence of water and some oxidized iron (Fe<sub>2</sub>O<sub>3</sub>) – as these are both non-stoichiometric they cannot be accurately calculated.
